# Supplementary material for: TCF7L2 rs290487 C allele aberrantly enhances hepatic gluconeogenesis through allele-specific changes in transcription and chromatin binding
Source: publisher site journal article supplement (doi:10.18632/aging.103442), 2020-07-10
Supplement: Supplementary file [file aging-v12i13-103442-supplementary-material-SD1.pdf]

**SUPPLEMENTARY FIGURES**

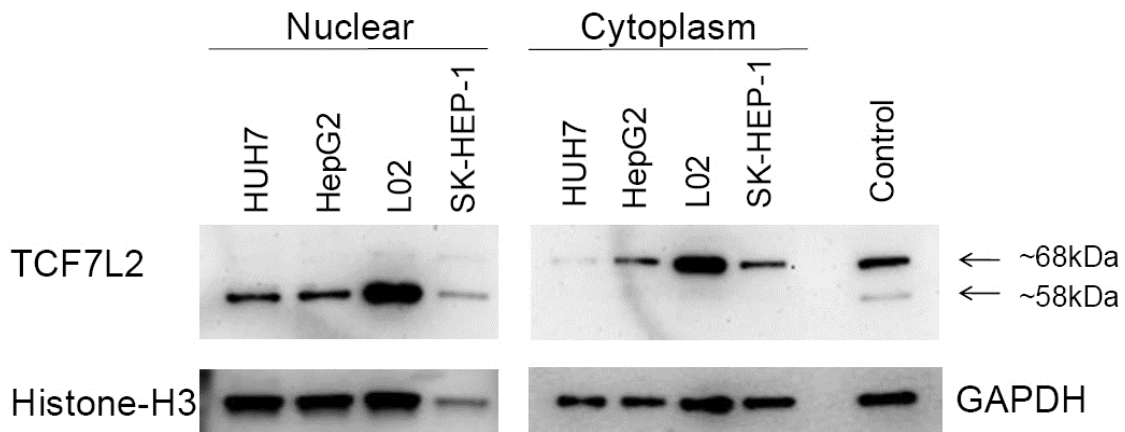

**Supplementary Figure 1. TCF7L2 protein products in human liver cell lines.** TCF7L2 protein products in the nuclear and cytoplasm of 4 human liver cell lines (HUH7, HepG2, Lo2, and SK-HEP-1). The total protein of PLC-PRF-5 cells was used as a positive control.

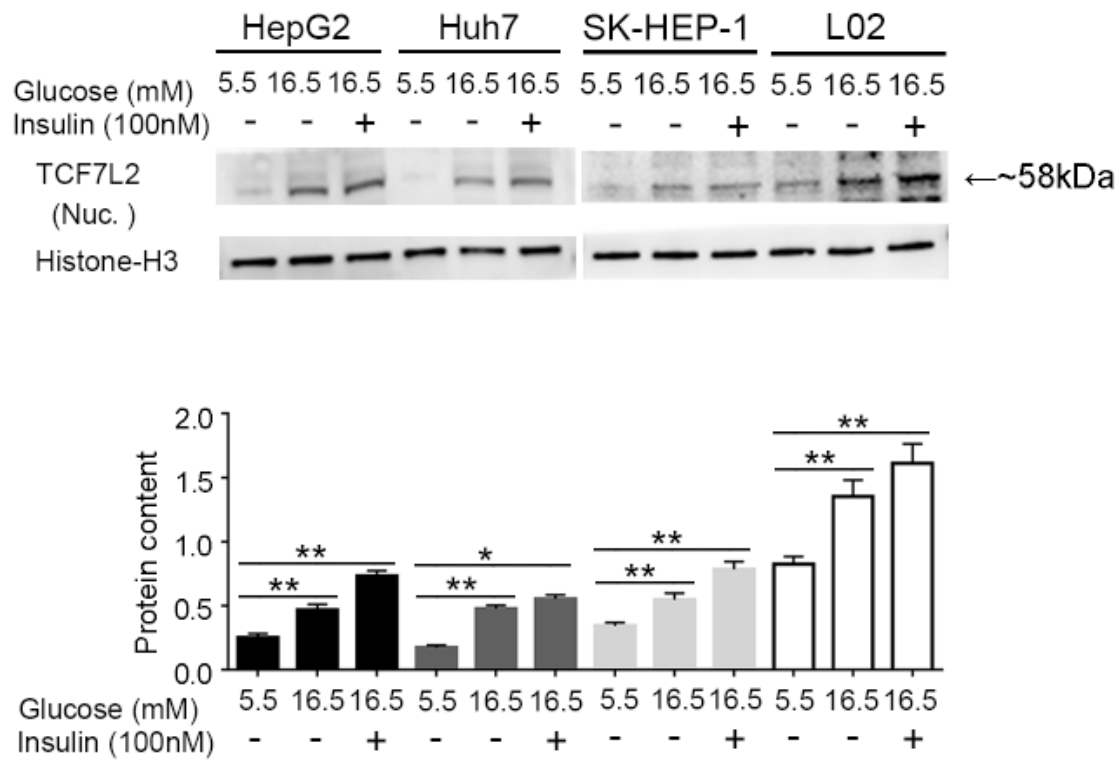

**Supplementary Figure 2. TCF7L2 nuclear protein contents were increased by high glucose and insulin treatment in liver cell lines. \*\*P<0.01.**

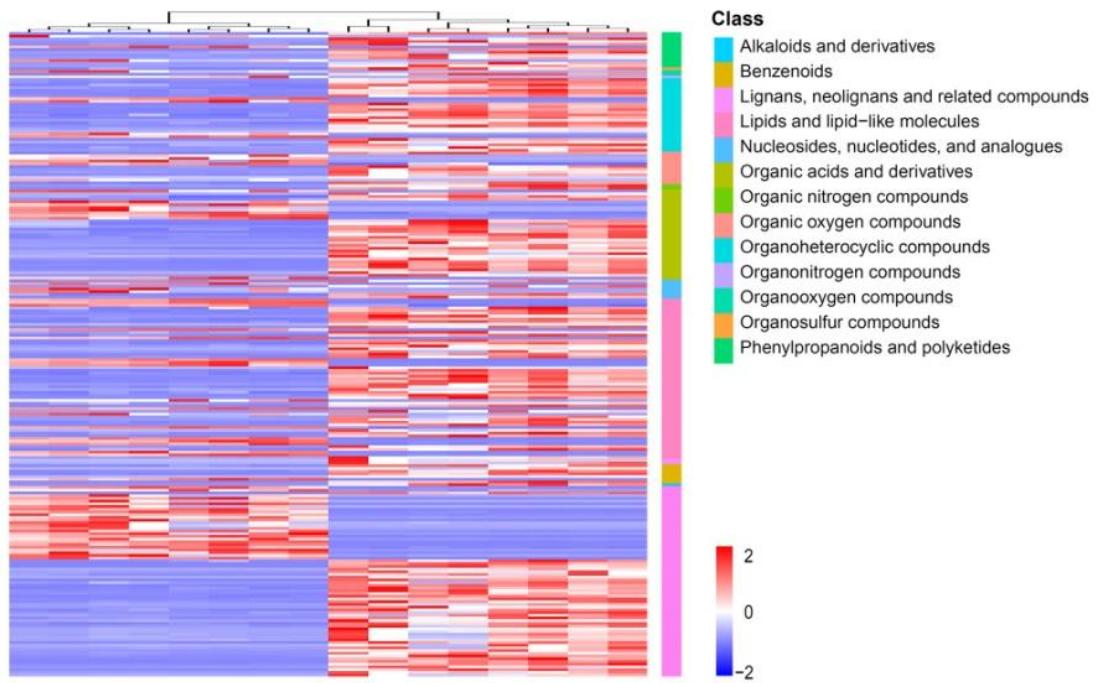

Supplementary Figure 3. Heatmap showing the classification of differential expressed metabolites (Variable Importance in the Projection >2, fold change > 5,  $P < 0.05$ ) between C/C- and C/T-cells.

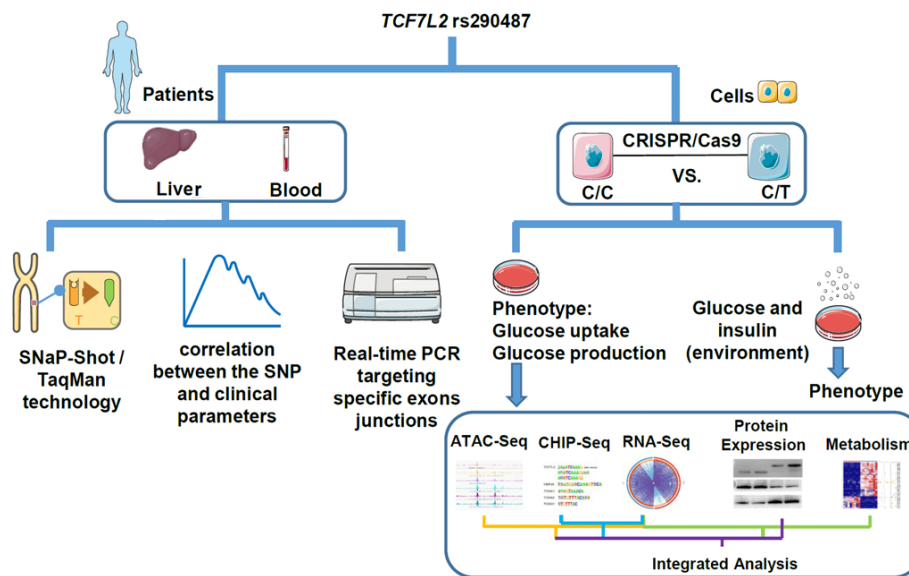

Supplementary Figure 4. A workflow showing the study design and experiments which were performed.
